# Supplementary material
Source: PubMed Central journal article supplement (PMC4048903)
Supplement: mt20145x1.pdf [file mt20145x1.pdf]

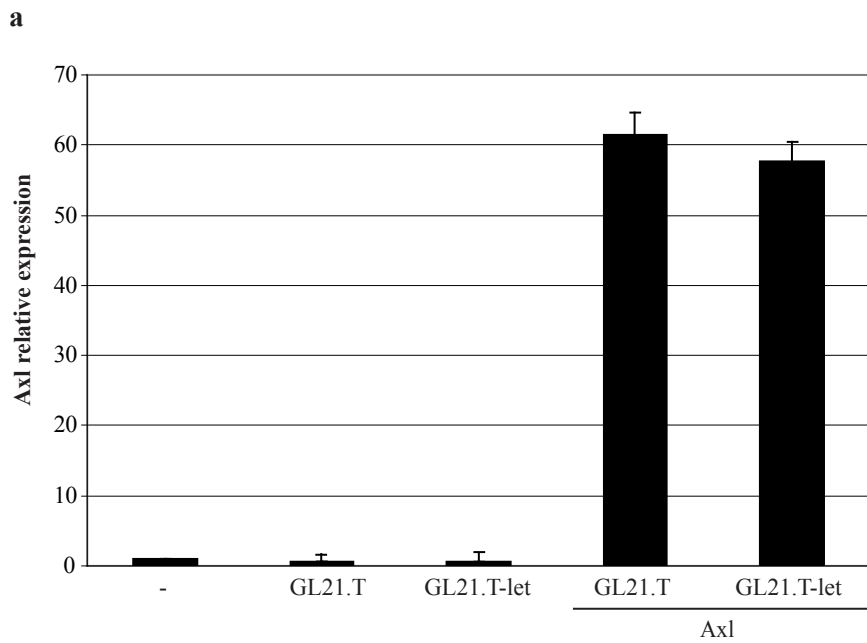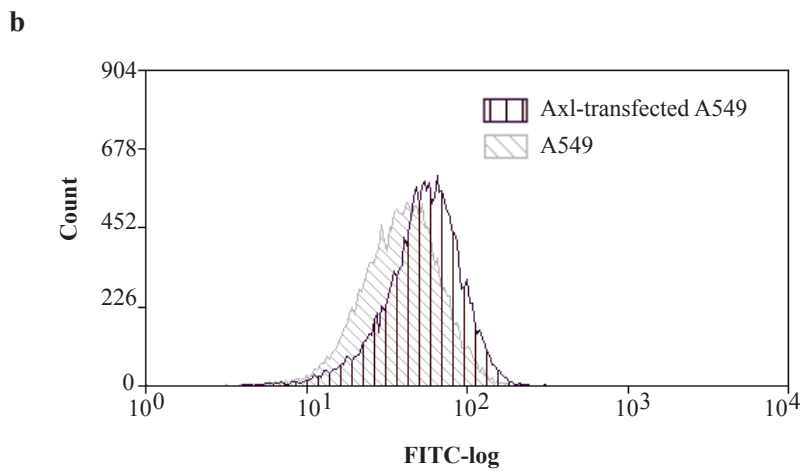

**Figure S1. Axl over-expression in A549 (Axl+) cells.** Axl expression in A549 cells transfected with Axl TruClone was analysed by RT-qPCR (**a**) or by FACS by using anti-Axl primary antibody and FITC-labelled secondary antibody (**b**).
