# Supplementary material
Source: PubMed Central journal article supplement (PMC4048903)
Supplement: mt20145x2.pdf [file mt20145x2.pdf]

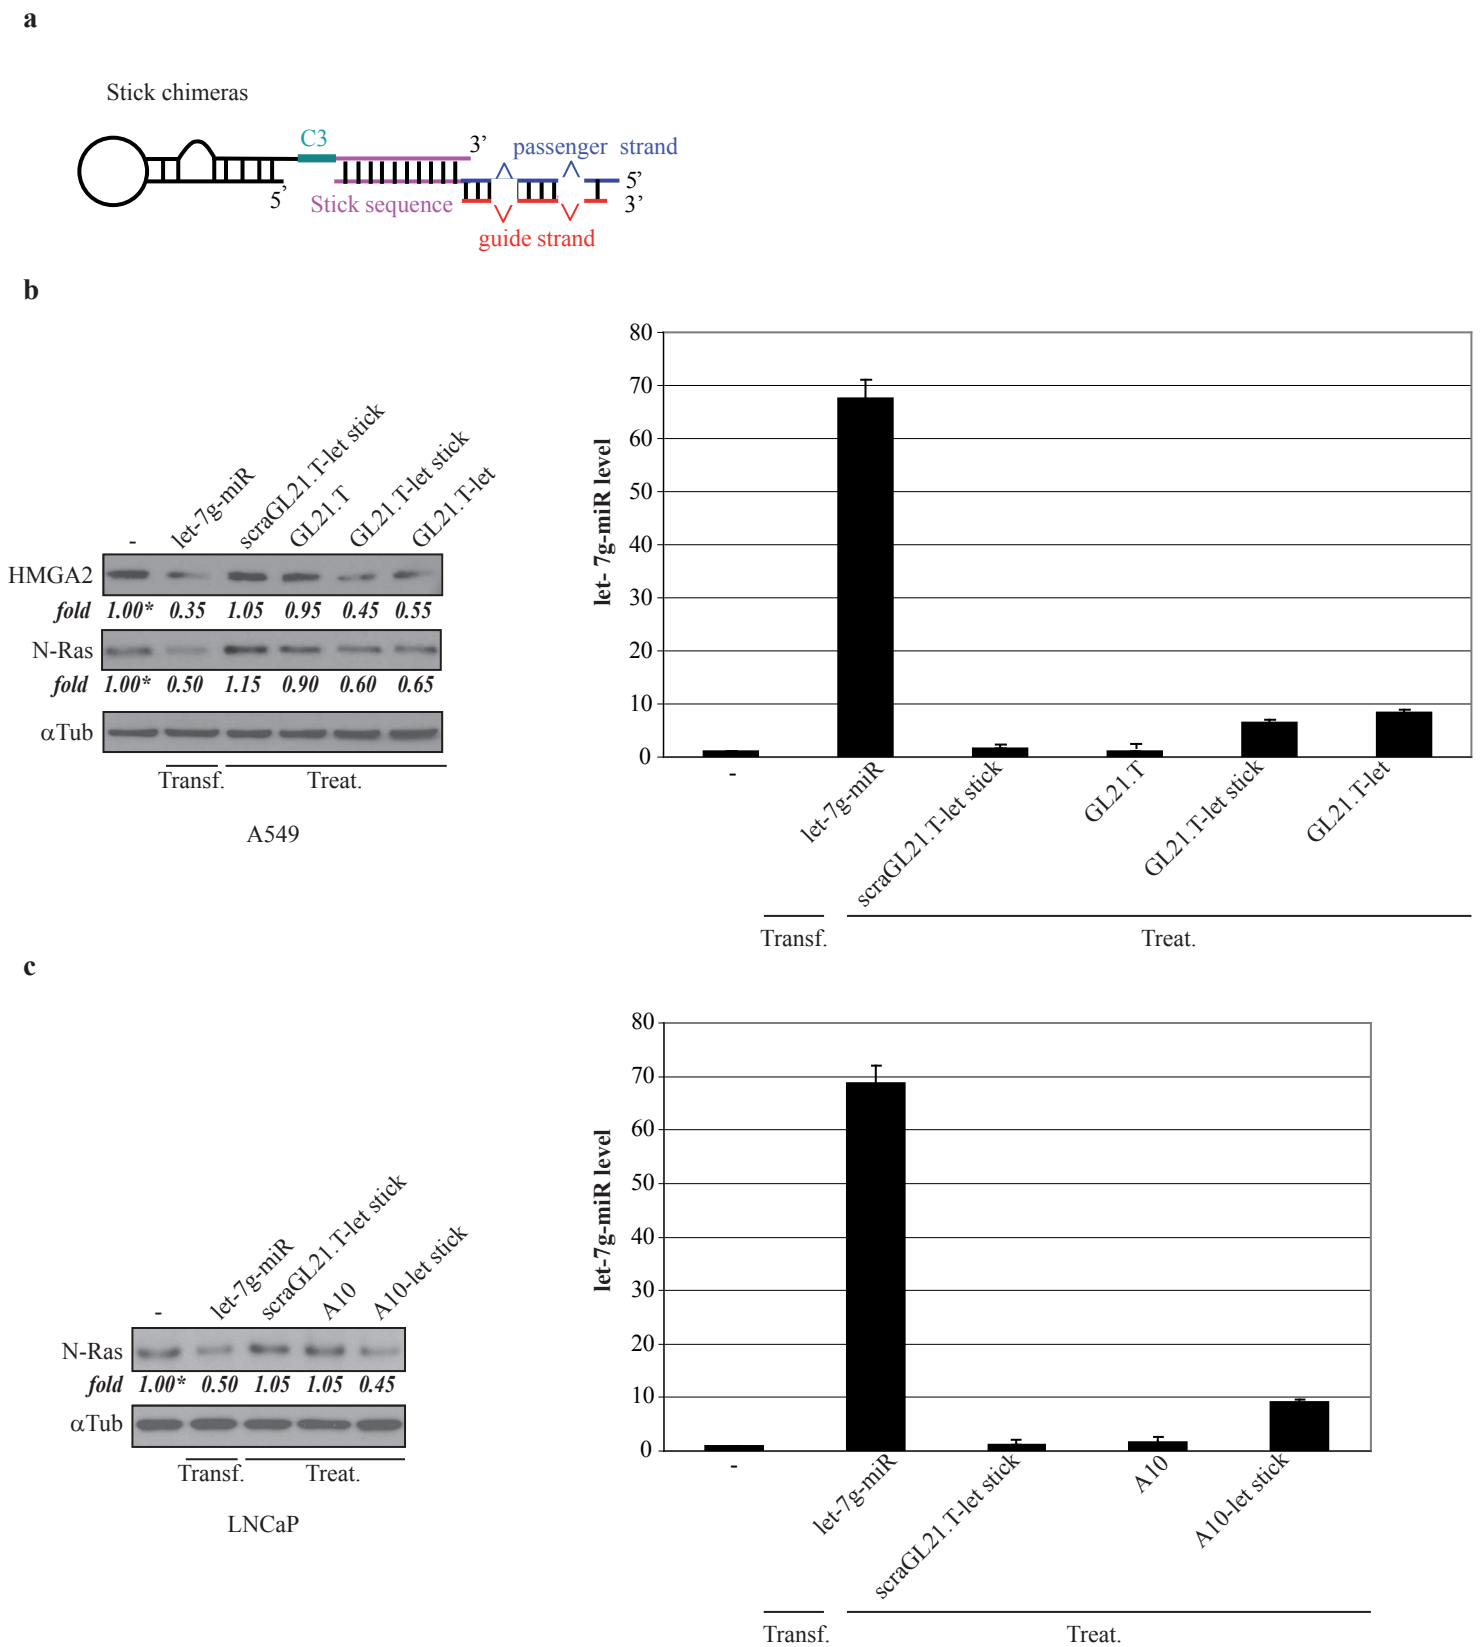

**Figure S2. Stick-based conjugates.** (a) Schematic representation aptamer stick based chimera. (b, c) A549 or LNCaP cells were transfected with 100nM let-7g-miR or treated with 400nM of GL21.T, A10 or chimeras, as indicated. *Left*, following 48 h cell lysates were immunoblotted with anti-HMGA2, anti-N-Ras and anti- $\alpha$ tubulin antibodies. Values below the blots indicate signal levels relative to mock-treated cells, arbitrarily set to 1 (“-”, labeled with asterisk). Intensity of bands has been calculated as in **Fig.1**. *Right*, let-7g miRNA levels were quantified by RT-qPCR. Error bars depict means  $\pm$  S.D. (N = 3). Transfection (Tranf.) or treatment (Treat.) are indicated.
