# Supplementary material
Source: PubMed Central journal article supplement (PMC4048903)
Supplement: mt20145x4.pdf [file mt20145x4.pdf]

a

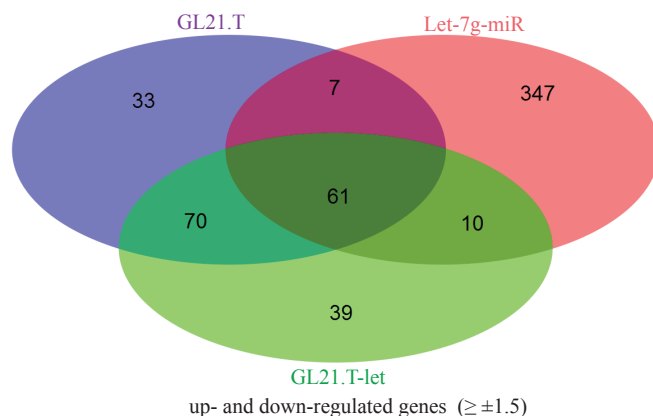

b

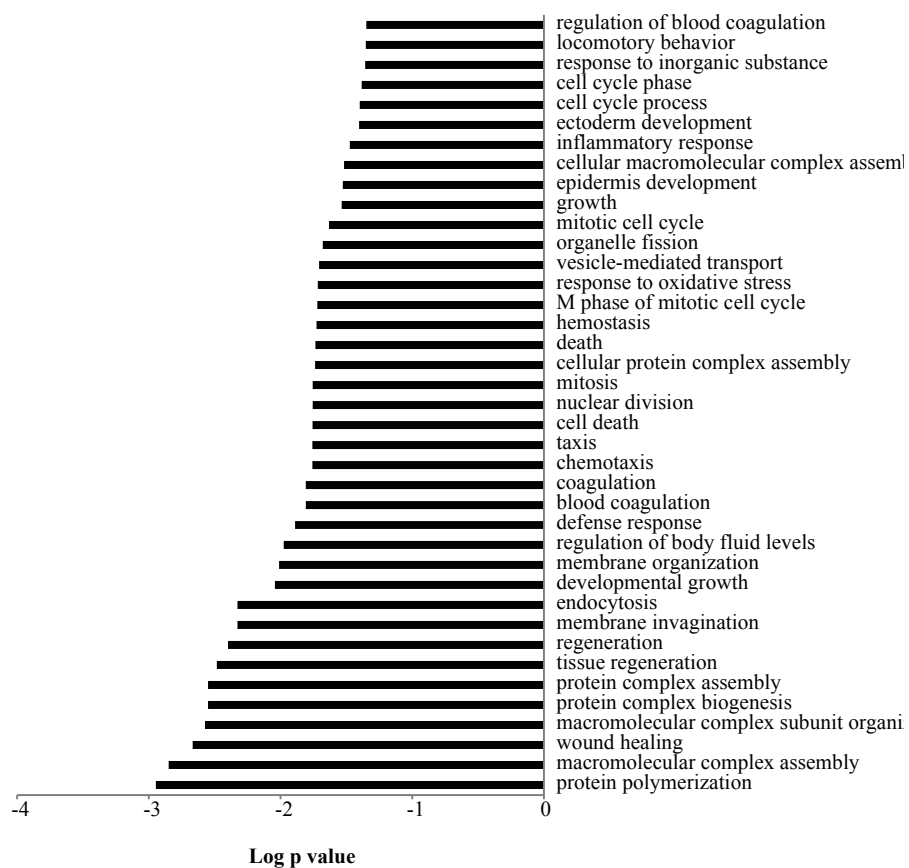

**Figure S4. Illumina array analyses.** (a) Venn diagram of down-regulated or up-regulated ( $\geq \pm 1.5$ ) genes following let-7g-miR-transfection, GL21.T- and GL21.T-let-treatment is shown. (b) Gene ontology analyses of significantly down-regulated or up-regulated ( $\geq \pm 1.5$ ) genes from Illumina analyses following GL21.T-let-treatment.
