# Supplementary material
Source: PubMed Central journal article supplement (PMC4048903)
Supplement: mt20145x5.pdf [file mt20145x5.pdf]

INF response  
2 week post-treatment

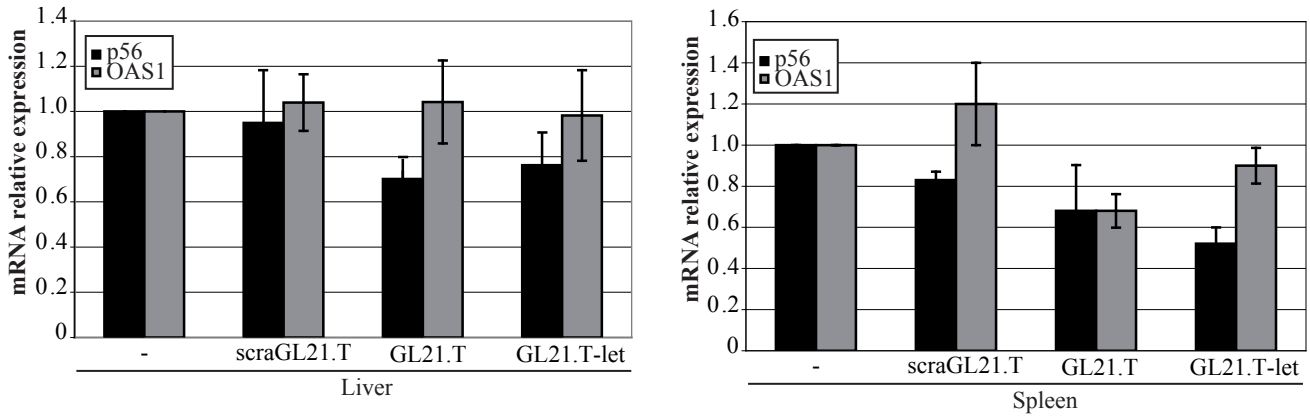

**Figure S5. Immune response analyses 2-week post-treatment.** At end of tumor growth experiment, animals were sacrificed, liver (*left*) and spleen (*right*) were recovered, lysed for RNA extraction and pooled. PBS-treated mice were used as a negative control. P56 and OAS1 mRNAs were analysed and values expressed as relative to control arbitrarily set to 1. Error bars depict means  $\pm$  S.D..
